# Supplementary material for: Maximizing CRISPR/Cas9 phenotype penetrance applying predictive modeling of editing outcomes in Xenopus and zebrafish embryos
Source: PubMed Central journal article supplement (PMC7473854; doi:10.1038/s41598-020-71412-0), 2020-09-04
Supplement: 41598_2020_71412_MOESM1_ESM.pdf [file 41598_2020_71412_MOESM1_ESM.pdf]

## Supplementary Figures to:

# Maximizing CRISPR/Cas9 phenotype penetrance applying predictive modeling of editing outcomes in *Xenopus* and zebrafish embryos

Thomas Naert<sup>1,2,6</sup>, Dieter Tulkens<sup>1,2,6</sup>, Nicole A. Edwards<sup>3</sup>, Marjolein Carron<sup>1,4</sup>, Nikko-Ideen Shaidani<sup>5</sup>, Marcin Wlizla<sup>5</sup>, Annekatrien Boel<sup>4</sup>, Suzan Demuynck<sup>1,2</sup>, Marko E. Horb<sup>5</sup>, Paul Coucke<sup>4</sup>, Andy Willaert<sup>4</sup>, Aaron M. Zorn<sup>3</sup>, Kris Vleminckx<sup>1,2,4,6</sup>

<sup>1</sup> Department of Biomedical Molecular Biology, Ghent University, Ghent, Belgium

<sup>2</sup> Cancer Research Institute Ghent, Ghent, Belgium

<sup>3</sup> Division of Developmental Biology, Perinatal Institute, and Center for Stem Cell and Organoid Medicine (CuSTOM), Cincinnati Children's Hospital, Cincinnati, USA

<sup>4</sup> Center for Medical Genetics, Department of Biomolecular Medicine, Ghent University, Ghent, Belgium

<sup>5</sup> National Xenopus Resource and Eugene Bell Center for Regenerative Biology and Tissue Engineering, Marine Biological Laboratory, Woods Hole, Massachusetts 02543, USA.

<sup>6</sup> These authors contributed equally to the work: Thomas Naert and Dieter Tulkens

### <sup>§</sup> Corresponding author

Kris Vleminckx, Ph.D.  
Dept. for Biomedical Molecular Biology  
Ghent University  
Technologiepark 71  
B-9052 Ghent (Zwijnaarde)  
Tel +32-9-33-13760, Fax +32-9-221 76 73,  
E-mail : kris.vleminckx@irc.UGent.be

## Supplementary figure 1

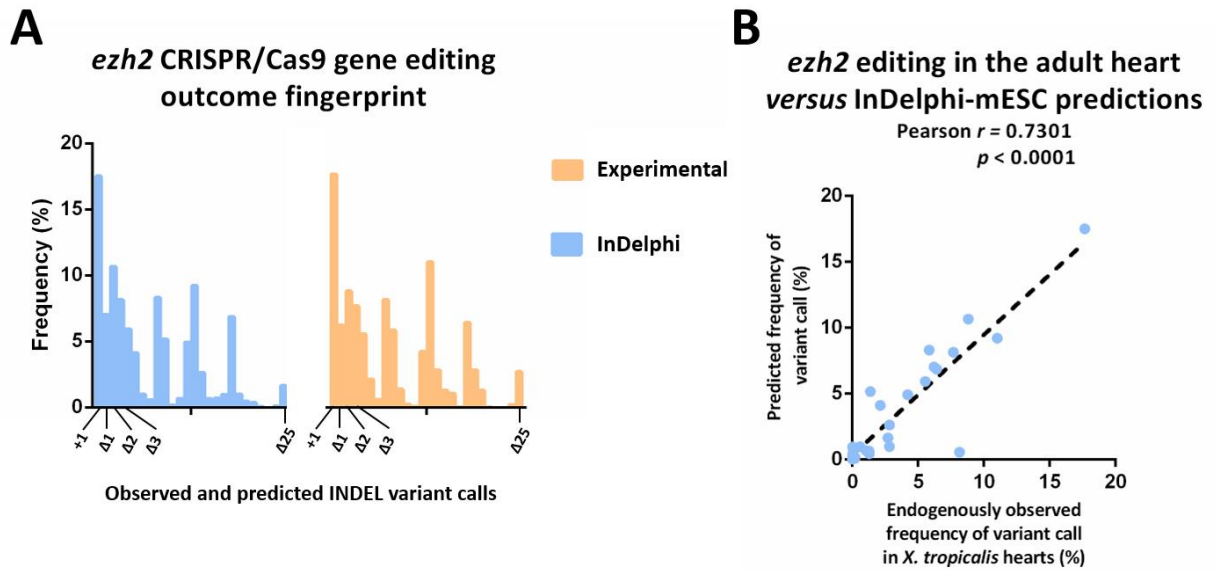

**Fig. S1: *ezh2* CRISPR/Cas9 gene editing outcome can be accurately predicted via the online prediction algorithm InDelphi. (A)** Column graphs showing overlay of variant calls (%) between *in vivo* observations and *in silico* predictions **(B)** Pearson correlation with significance interval between *in vivo* observations and *in silico* predictions for the *ezh2* gRNA.

## Supplementary figure 2

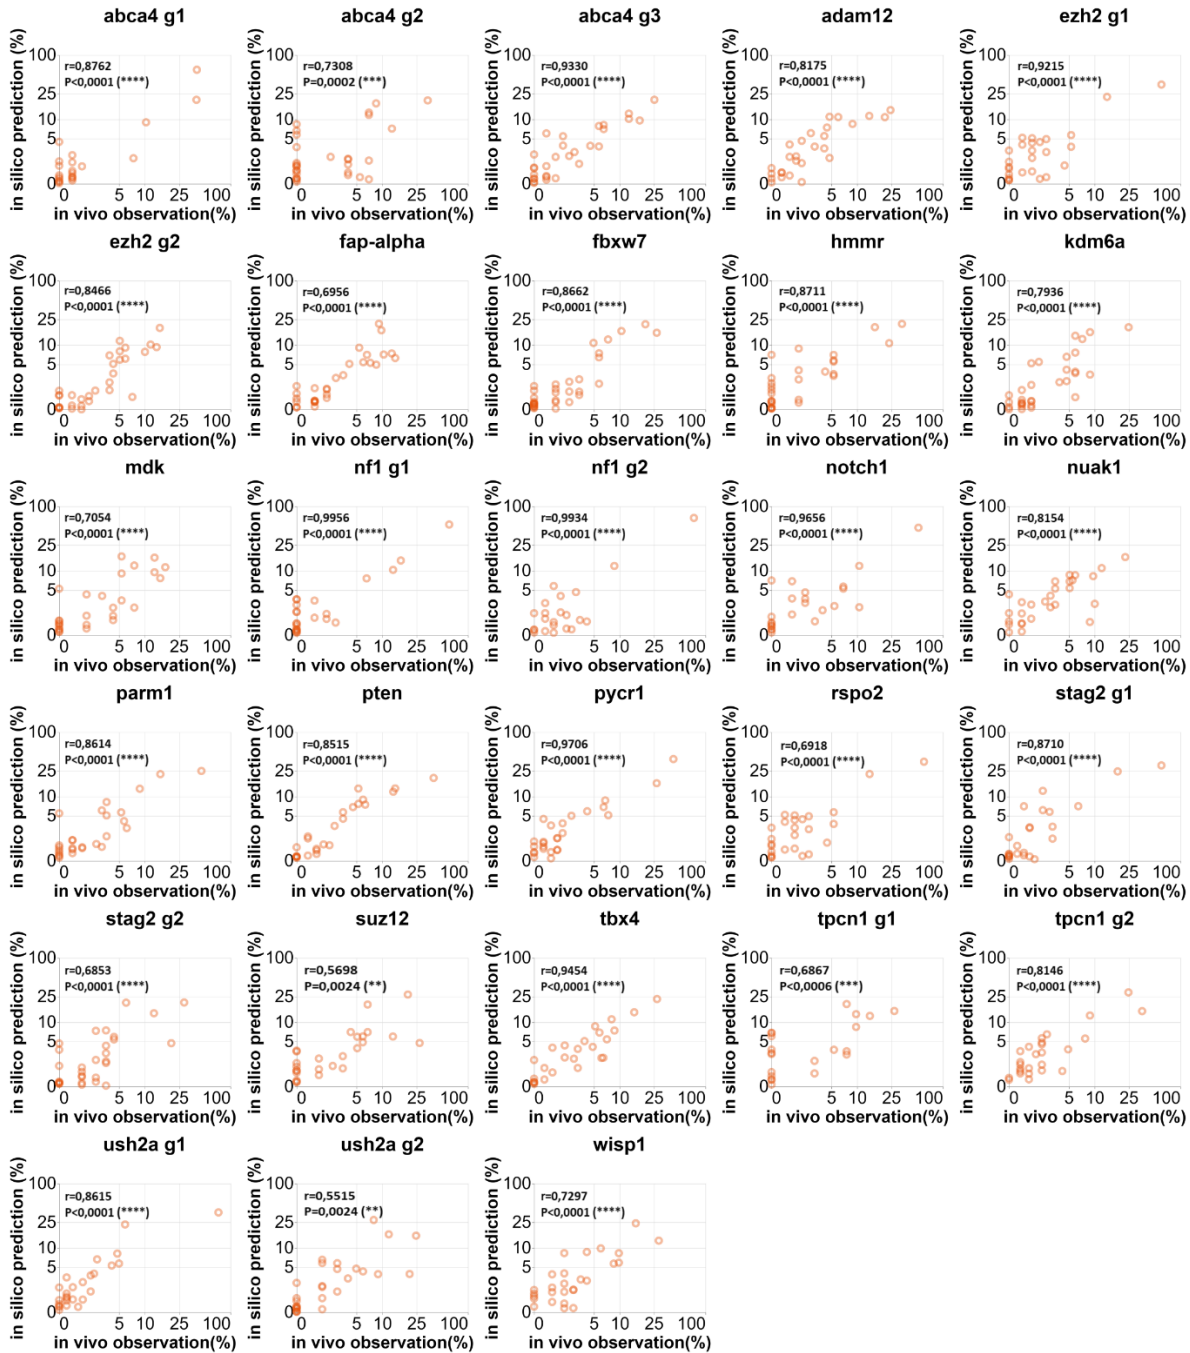

**Fig. S2: Pearson correlations between *in vivo* observed (obtained by targeted amplicon sequencing) and respective *in silico* predicted variant frequencies for 28 gRNAs injected in *X. tropicalis* embryos.** gRNAs are injected as Cas9/gRNA-ribonucleoprotein complexes at early developmental stages (2 to 8 cell stage). Target regions are PCR amplified and sequenced using MiSeq sequencing (Illumina) and raw data is processed using the BATCH-GE analysis software. *In silico* predictions are generated by the InDelphi software algorithm. Plots show correlations between *in vivo* observed and *in silico* predicted variant frequencies. x\_g1, x\_g2, x\_g3 refers to different guide RNAs against the same gene. (\*\*\*\*p < 0.0001; \*\*\*p < 0.001; \*\*p < 0.01).

### Supplementary figure 3

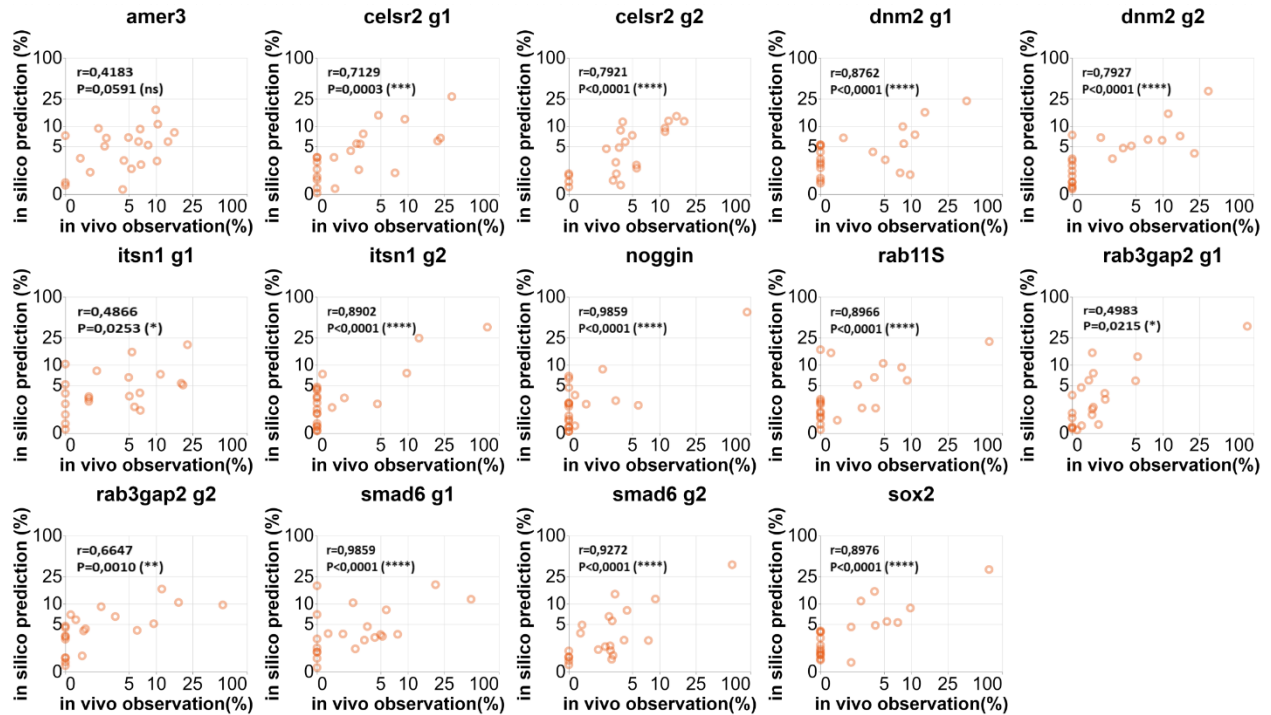

**Fig. S3: Pearson correlations between *in vivo* observations (generated by Sanger sequencing and sequence trace deconvolution) and respective *in silico* predictions of 14 gRNAs injected in *X. tropicalis* embryos.** gRNAs are injected as Cas9/gRNA-ribonucleoprotein complexes at early developmental stages (1-cell stage). Target regions are PCR amplified and sequenced using Sanger sequencing and deconvoluted using the Inference of CRISPR Edits (ICE) algorithm. *In silico* predictions are generated by the InDelphi software algorithm. Plots show correlations between *in vivo* observed and *in silico* predicted variant frequencies. x\_g1, x\_g2 refers to different guide RNAs against the same gene. (\*\*\*\* $p < 0.0001$ ; \*\*\* $p < 0.001$ ; \*\* $p < 0.01$ ; \* $p < 0.05$ ; ns = not significant).

## Supplementary figure 4

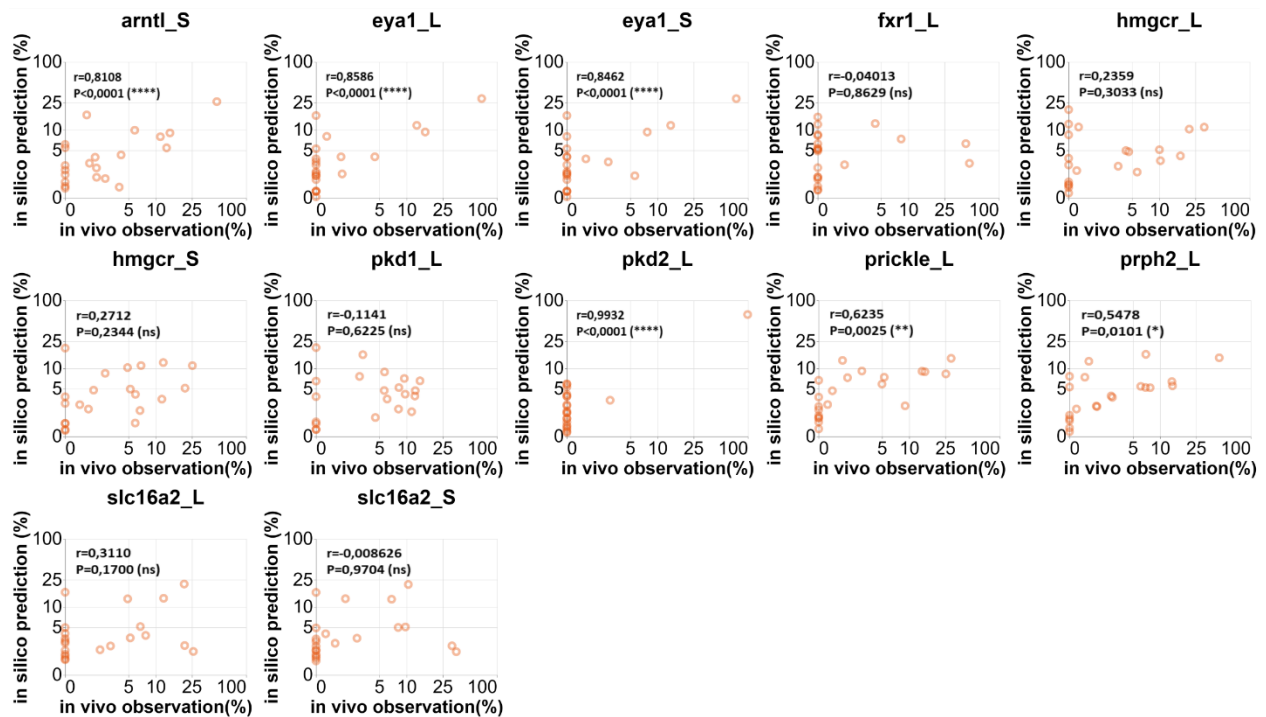

**Fig. S4: Pearson correlations between *in vivo* observations (generated by Sanger sequencing and sequence trace deconvolution) and respective *in silico* predictions of 10 gRNAs injected in *X. laevis* embryos.** gRNAs are injected as Cas9/gRNA-ribonucleoprotein complexes at early developmental stages (1-cell stage). Target regions are PCR amplified and sequenced using Sanger sequencing and deconvoluted using the Inference of CRISPR Edits (ICE) algorithm. *In silico* predictions are generated by the InDelphi software algorithm. Plots show correlations between *in vivo* observed and *in silico* predicted variant frequencies. Gene name\_S and gene name\_L refers to the two homeologues of a particular gene present on the small and large chromosome, respectively. (\*\*\*\* $p < 0.0001$ ; \*\* $p < 0.01$ ; \* $p < 0.05$ ; ns = not significant).

## Supplementary figure 5

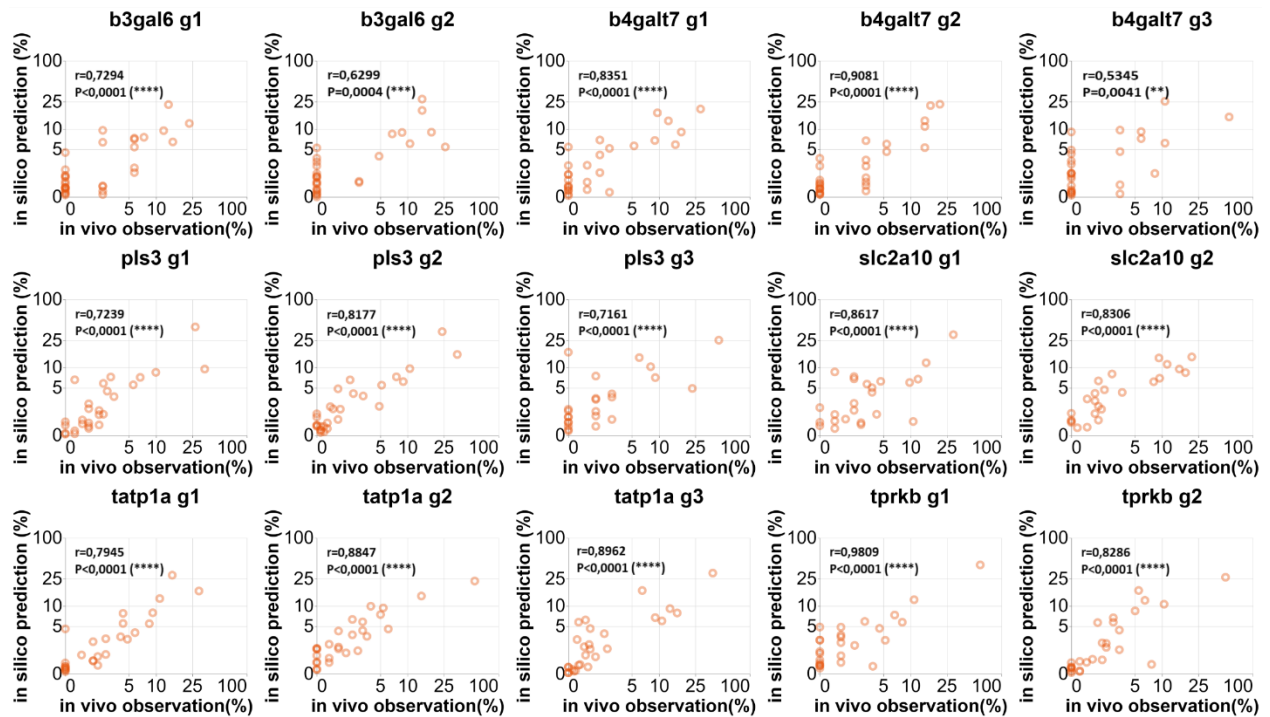

**Fig. S5: Pearson correlations between *in vivo* observations (generated by targeted amplicon sequencing) and respective *in silico* predictions of 15 gRNAs injected in zebrafish embryos.** gRNAs are injected as Cas9/gRNA-ribonucleoprotein complexes at early developmental stages (1 cell stage). Target regions are PCR amplified and sequenced using MiSeq sequencing (Illumina) and raw data is processed using the BATCH-GE analysis software. *In silico* predictions are generated by the InDelphi software algorithm. Plots show correlations between *in vivo* observed and *in silico* predicted variant frequencies. x\_g1, x\_g2, x\_g3 refers to different guide RNAs against the same gene. (\*\*\*\* $p < 0.0001$ ; \*\*\* $p < 0.001$ ; \*\* $p < 0.01$ ).

Supplemental figure 6

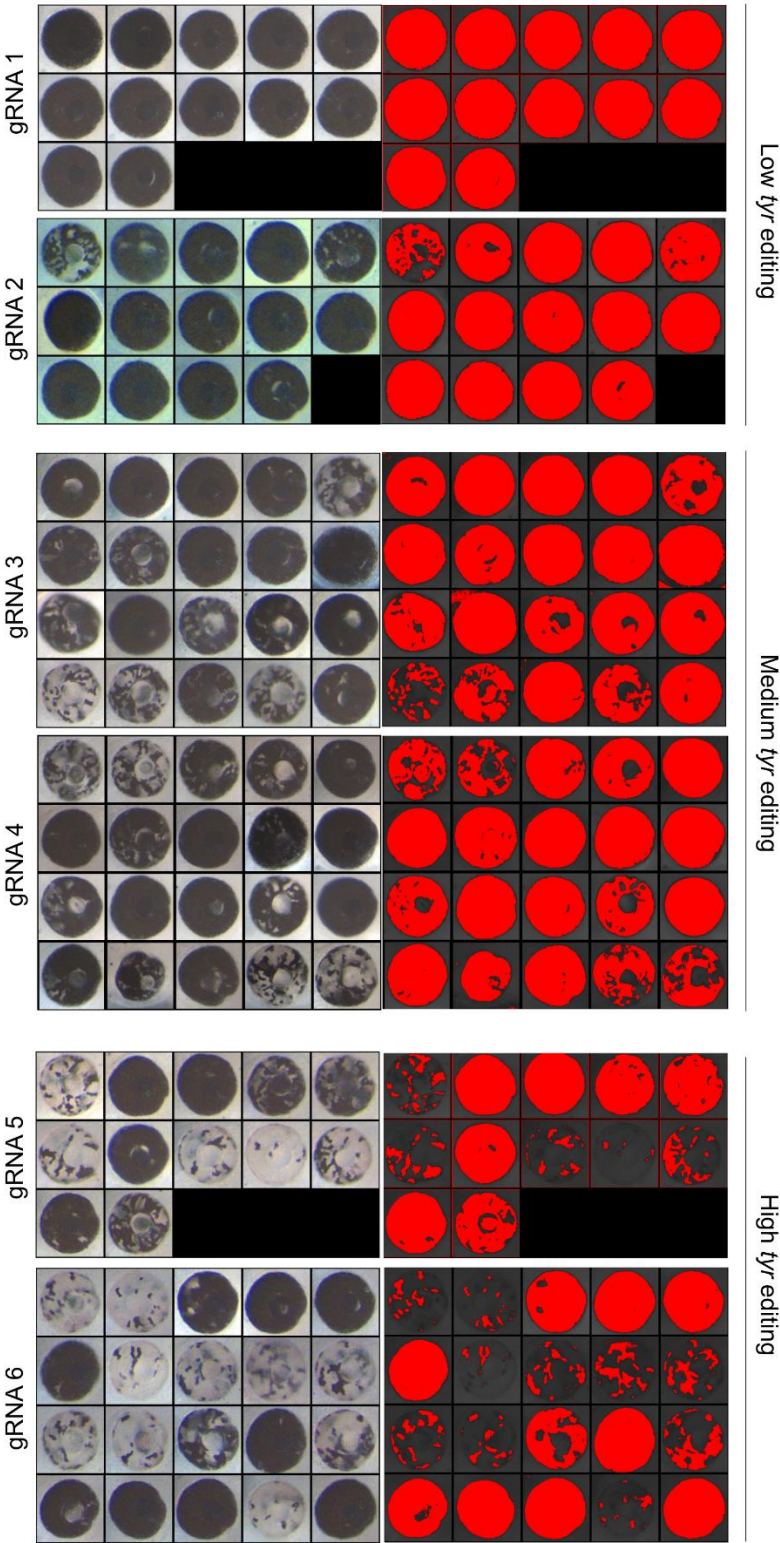

Fig. S6: Pictures from eyes of *tyrosinase* mutant embryos with their associated threshold mask used for quantification.

## Supplementary table legends

**Supplementary table 1. (Sheet A)** *X. tropicalis* guide RNA (n=42) genomic target sites and oligos and genotyping primers for downstream targeted amplicon sequencing. **(Sheet B)** *X. laevis* guide RNA (n=12) genomic target sites, oligos and genotyping primers for downstream Sanger sequencing and sequence trace deconvolution. **(Sheets C)** Zebrafish guide RNA (n=15) genomic target sites and oligos and genotyping primers for downstream targeted amplicon sequencing.

**Supplementary table 2. Statistical analyses.** In relation to Fig. 2C. Tests of normality (Shapiro-Wilk) show  $p > 0.05$  for all groups. Significant differences in homogeneity are observed (Levene  $p < 0.05$ ). Groups show statistical significant differences (One-way Welch ANOVA to adjust for unequal variances,  $p < 0.001$ ). Games-Howell multiple comparisons are used as post-hoc tests between groups. In relation to Figure 4B. Mann Whitney test reveals statistically significant differences in percentage of repair by MMEJ when respectively comparing highest-in-class gRNAs (n=4,860) to a random selection of gRNAs (n=4,860) ( $p < 0.001$ ) and when comparing lowest-in-class gRNAs (n=4,860) to a random selection of gRNAs (n=4,860) ( $p < 0.001$ ).

**Supplementary table 3.** This file contains an overview of the cutting efficiencies of the *tyr* CRISPR gRNAs as determined by PCR amplification and targeted amplicon sequencing.
